# Supplementary material for: Isolating hydrogen from oxygen in photocatalytic water splitting with a carbon-quantum-dot/carbon-nitride hybrid
Source: Royal Society of Chemistry journal article supplement (doi:10.1039/c9ta00673g), 2019-01-01
Supplement: c9ta00673g1.pdf [file c9ta00673g1.pdf]

*Supplementary Information*

**Isolating Hydrogen from Oxygen in Photocatalytic  
Water Splitting with Carbon-Quantum-Dot/Carbon-  
Nitride Hybrid**

Xijun Wang,<sup>a</sup> Xiang Jiang,<sup>bc</sup> Edward Sharman,<sup>d</sup> Li Yang,<sup>a</sup> Xiyu Li,<sup>a</sup> Guozhen Zhang,<sup>a</sup> Jin Zhao,<sup>bc</sup>  
Yi Luo,<sup>ac</sup> Jun Jiang<sup>\*a</sup>

<sup>a</sup>Hefei National Laboratory for Physical Sciences at the Microscale, Collaborative Innovation Center of Chemistry for Energy Materials, CAS Center for Excellence in Nanoscience, School of Chemistry and Materials Science, University of Science and Technology of China, Hefei, Anhui 230026, P. R. China.

\*E-mail: [jiangj1@ustc.edu.cn](mailto:jiangj1@ustc.edu.cn)

<sup>b</sup>ICQD/Hefei National Laboratory for Physical Sciences at the Microscale, and Key Laboratory of Strongly-Coupled Quantum Matter Physics, Chinese Academy of Sciences, and Department of Physics, University of Science and Technology of China, Hefei, Anhui 230026, China.

<sup>c</sup>Synergetic Innovation Center of Quantum Information & Quantum Physics, University of Science and Technology of China, Hefei, Anhui 230026, China.

<sup>d</sup>Department of Neurology, University of California, Irvine, California 92697, USA

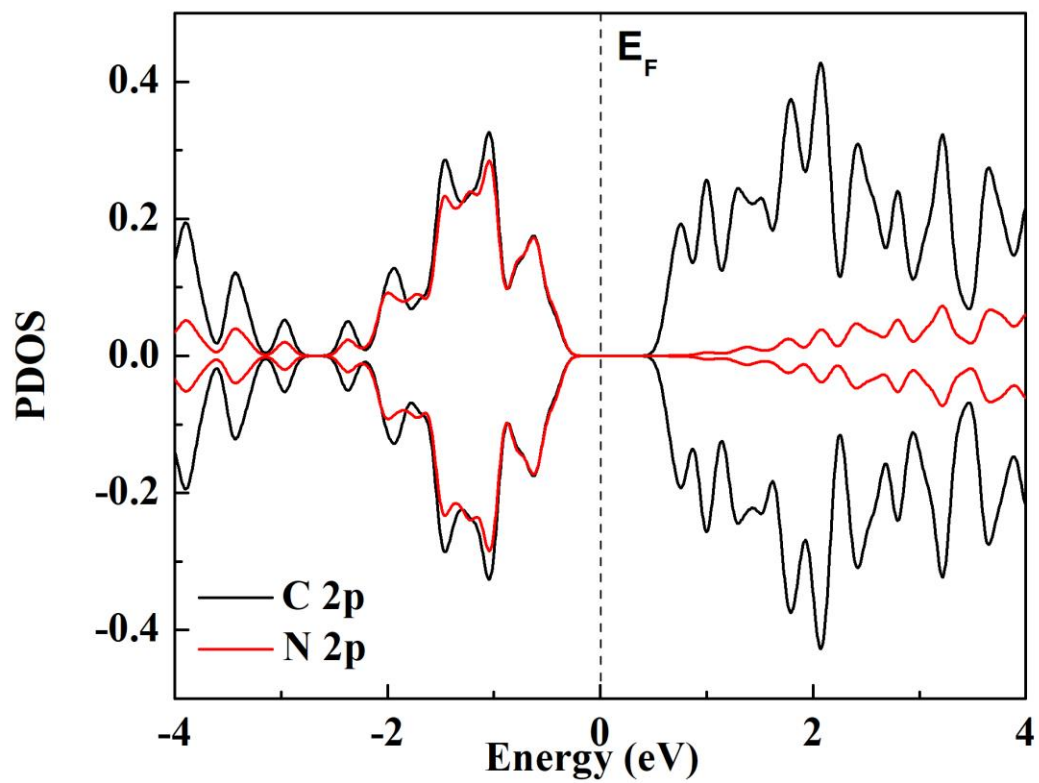

**Fig. S1** Computed PDOS of pristine C<sub>3</sub>N. Fermi level is set to zero.

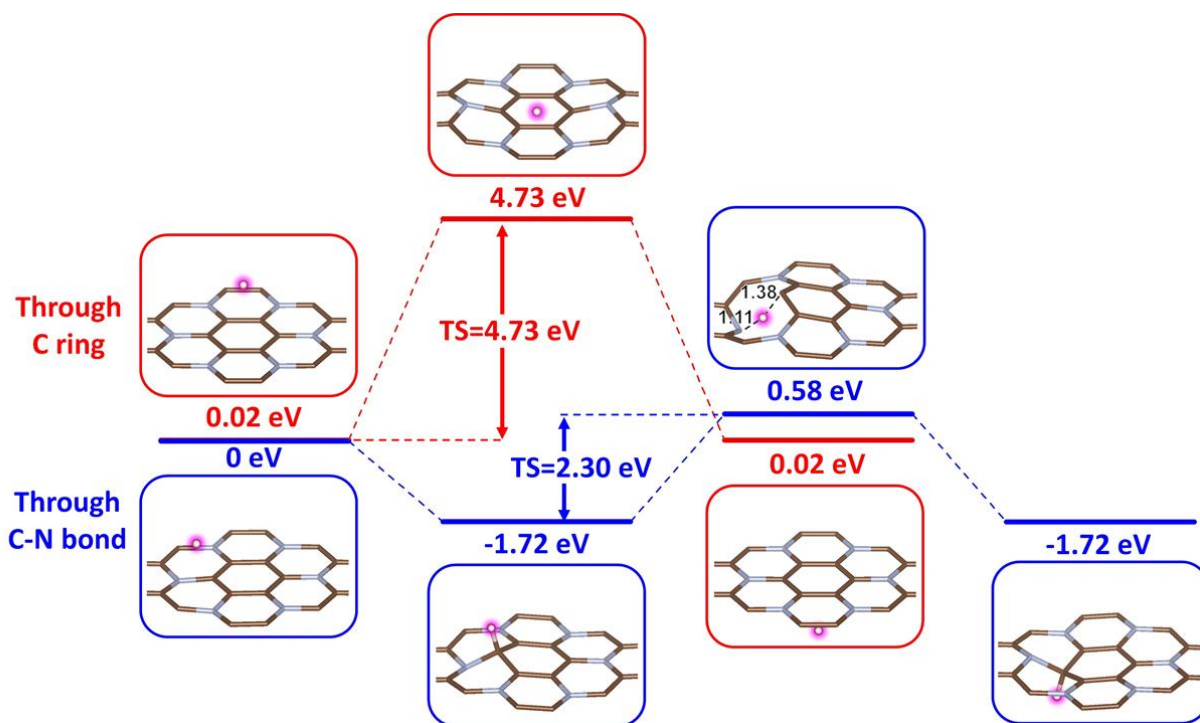

**Fig. S2** Energy potential profile along the reaction coordinate for proton migration through the C ring and C-N bond respectively.

The penetration barrier through the C ring (4.73 eV) is much higher than through the C-N bond (2.30 eV).

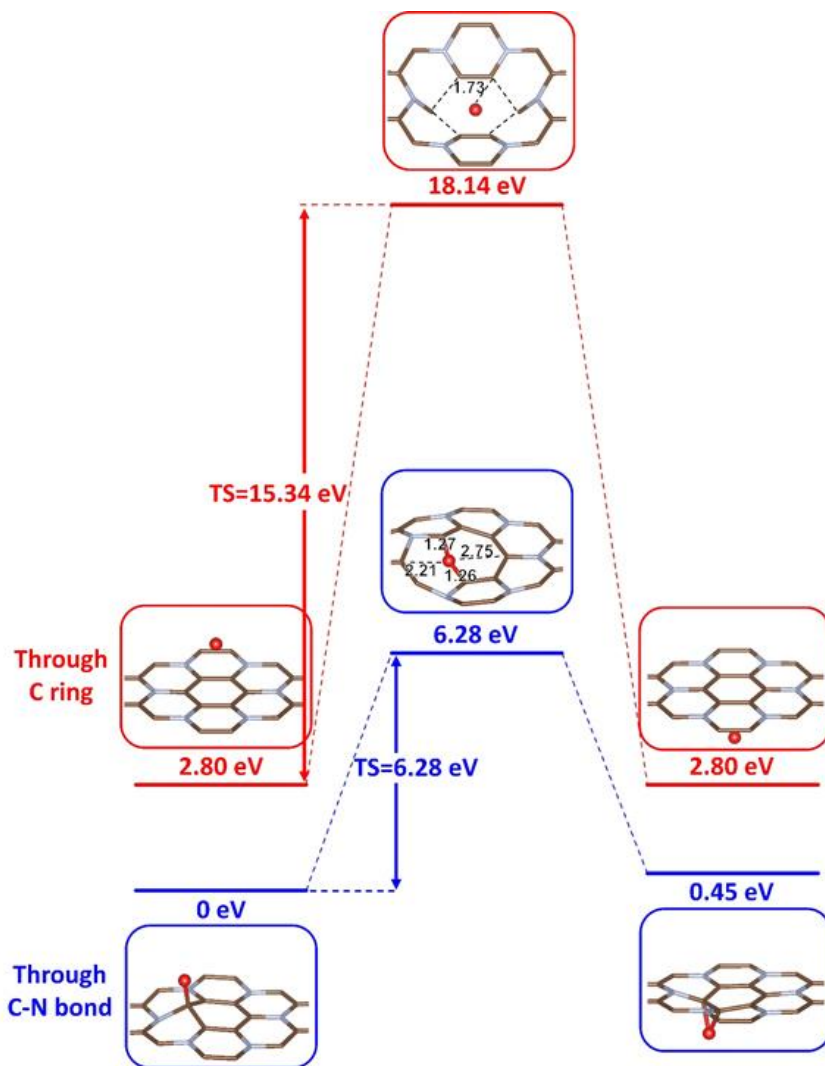

**Fig. S3** Energy potential profile along the reaction coordinate for oxygen atom migration through the C ring and C-N bond respectively.

The penetration barrier through the C ring (15.34 eV) is much higher than through the C-N bond (6.28 eV), and both are substantially higher than similar barriers for protons.

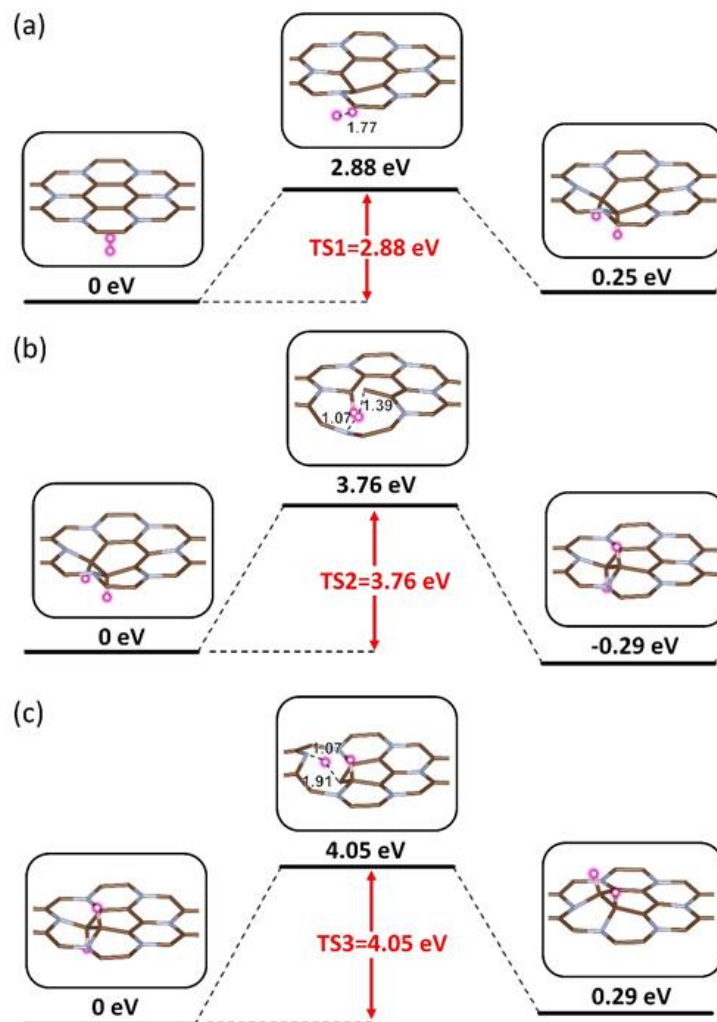

**Fig. S4** Energy potential profile along the reaction coordinate for (a) hydrogen molecule splitting, (b) one atomic hydrogen migration and (c) another atomic hydrogen migration through the C<sub>3</sub>N layer.

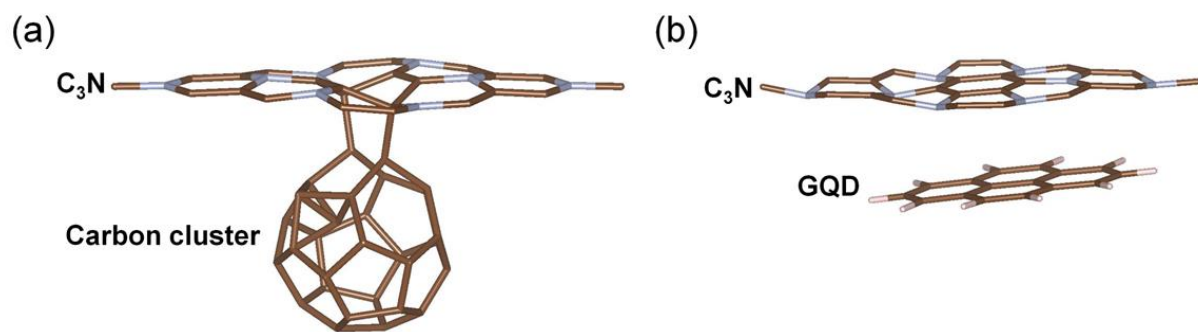

**Fig. S5** Alternatives to CQDs: Model of (a) carbon cluster/ $C_3N$  and (b) GQD/ $C_3N$  configurations.

**Table S1.** Computed binding energies of carbon cluster/C<sub>3</sub>N, GQD/C<sub>3</sub>N and diamond (111)/C<sub>3</sub>N models.

|                            | <b>Carbon cluster/C<sub>3</sub>N</b> | <b>GQD/C<sub>3</sub>N</b> | <b>Diamond (111)/C<sub>3</sub>N</b> |
|----------------------------|--------------------------------------|---------------------------|-------------------------------------|
| <b>Binding energy (eV)</b> | 2.52                                 | 0.86                      | 0.63                                |

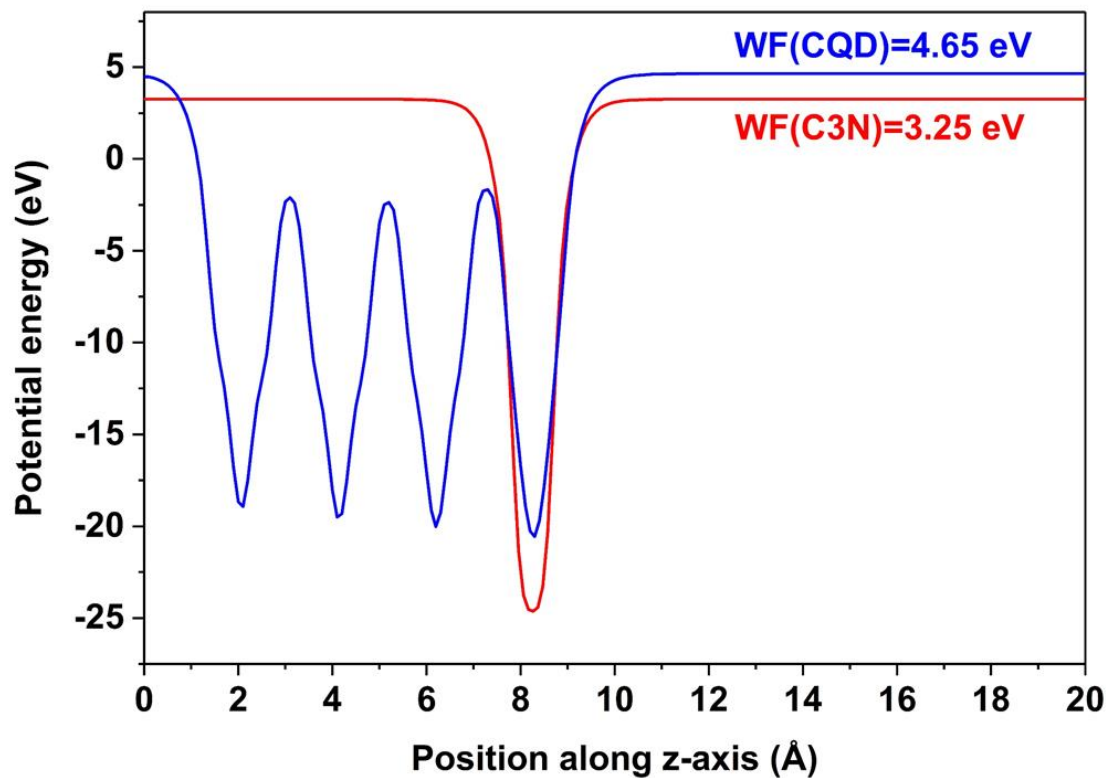

**Fig. S6** Potential energy surfaces of bare  $C_3N$  (red) and a CQD (blue) along the z-axis. Work functions are the convergent values of these curves.

The work function of  $C_3N$  is smaller than that of a CQD, suggesting that electrons should flow from  $C_3N$  to CQD, while holes should accumulate on  $C_3N$ .



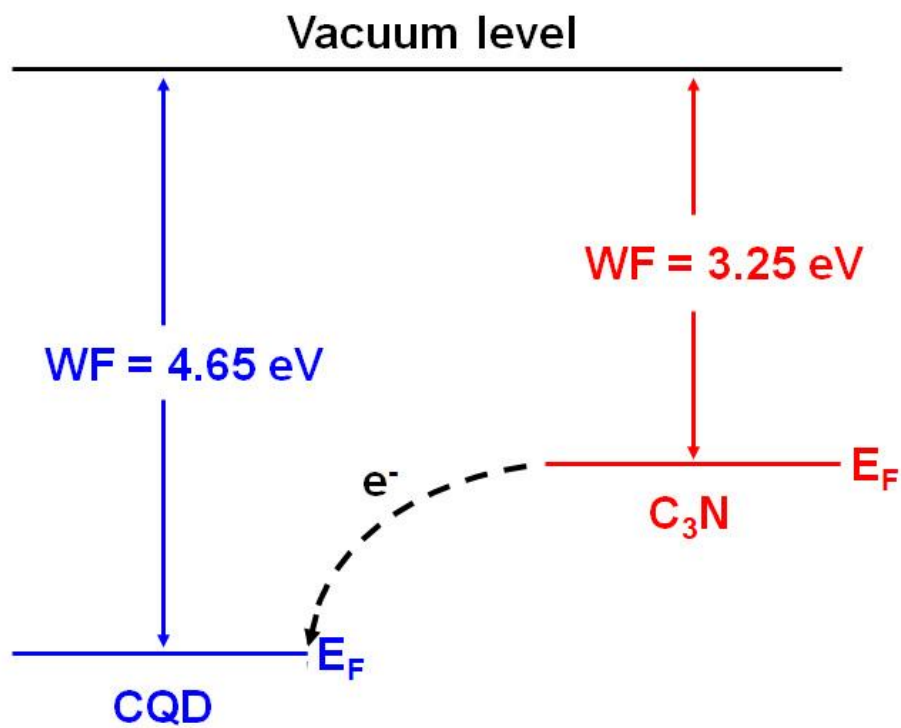

**Fig. S7** Schematic illustration of the charge transfer mechanism driven by the work function difference between CQD and C<sub>3</sub>N.

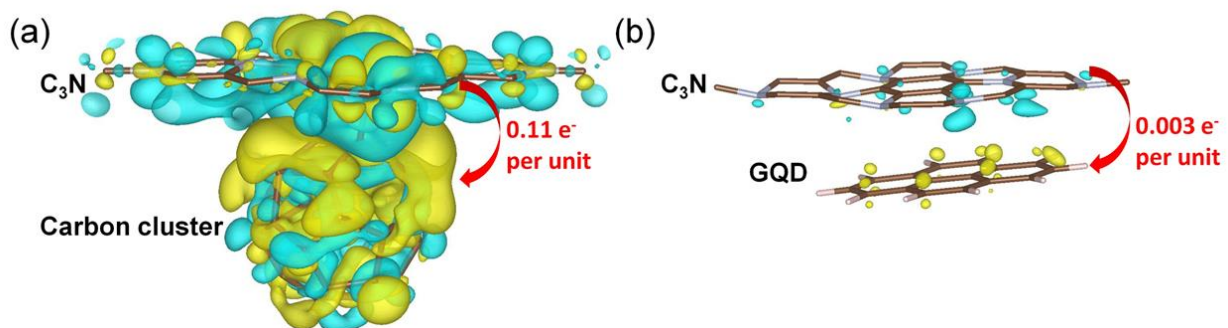

**Fig. S8** Charge density differences of the carbon cluster/ $C_3N$  and GQD/ $C_3N$  structures before light excitation. Yellow and blue bubbles represent electron and hole charge distributions with isosurface values of  $0.002$  and  $0.00025 e/\text{\AA}^3$  respectively.

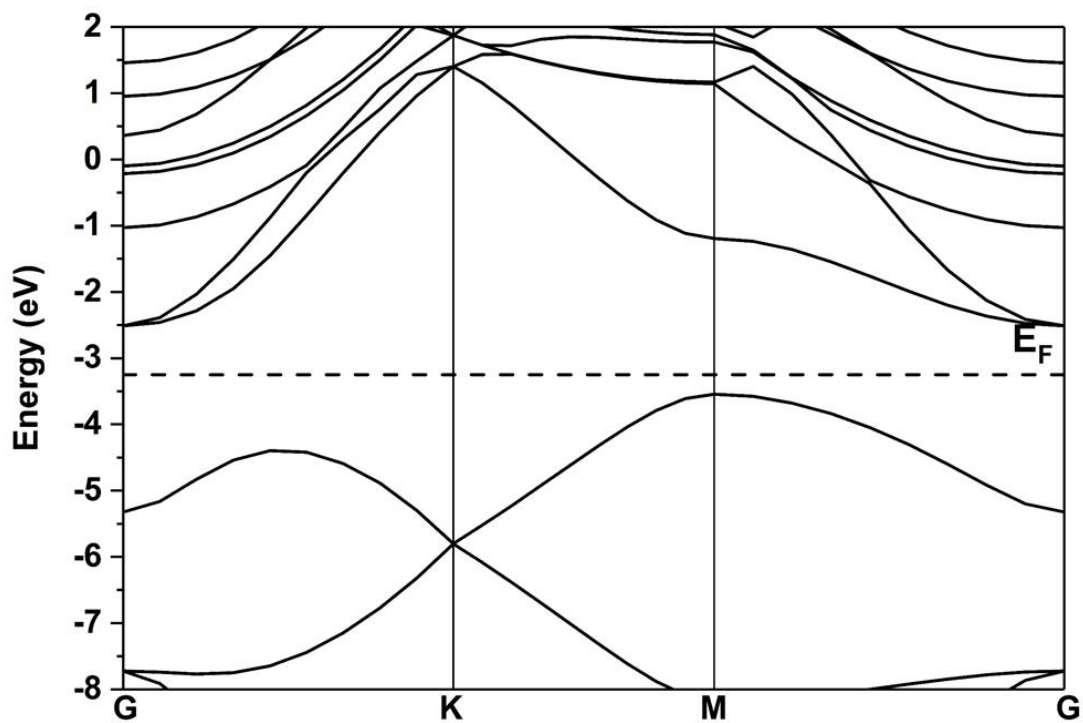

**Fig. S9** The computed energy band structure of bare C<sub>3</sub>N. G, K, and M represent coordinates for points of high symmetry.

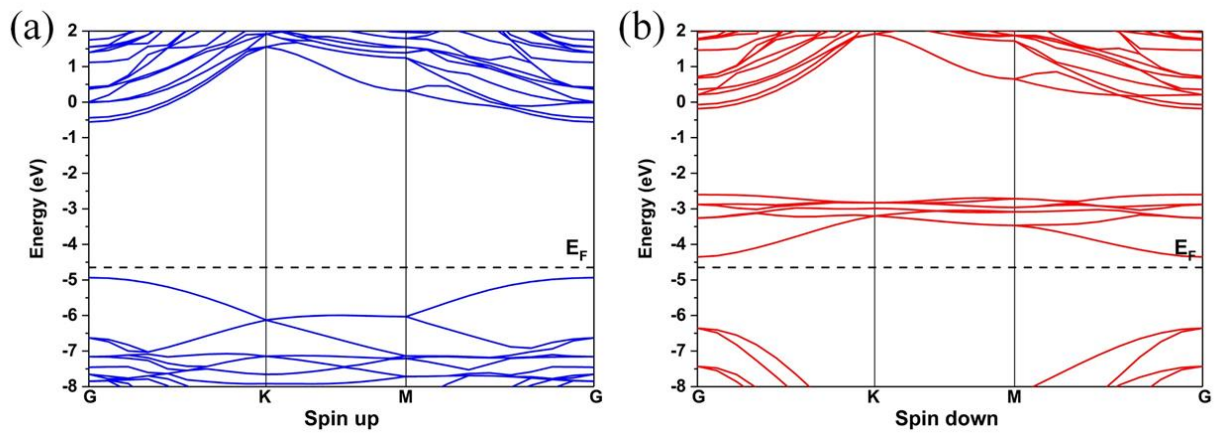

**Fig. S10** The computed (a) spin up and (b) spin down energy band structures of bare CQD.

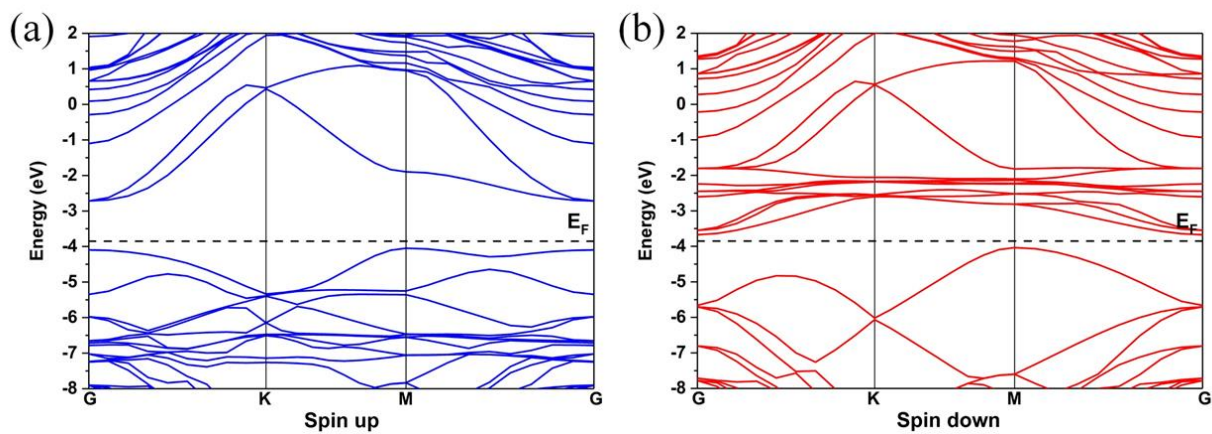

**Fig. S11** The computed (a) spin up and (b) spin down energy band structures of the CQD/C<sub>3</sub>N composite.

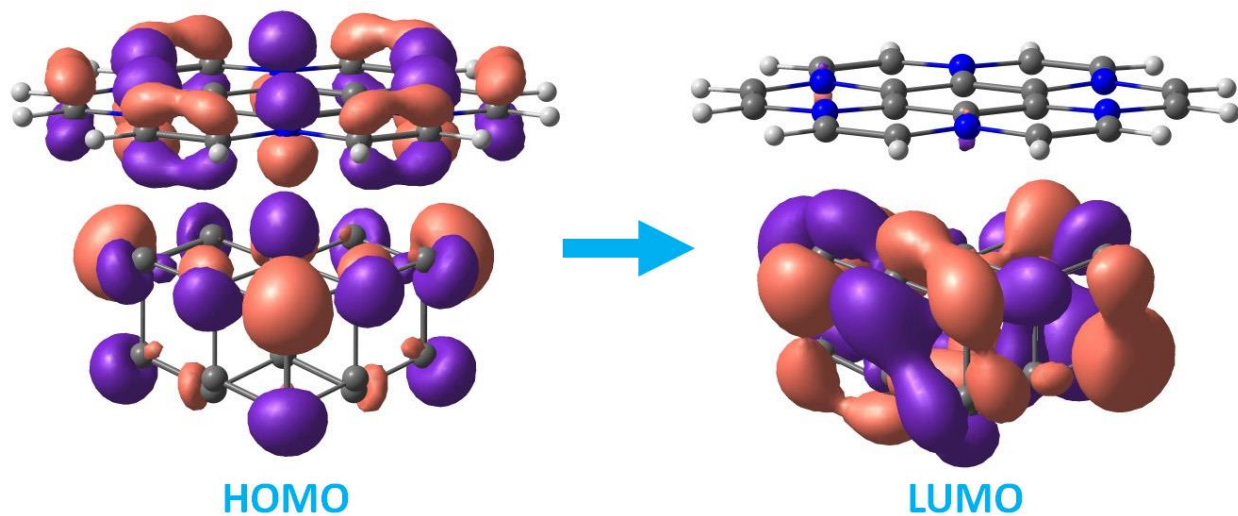

**Fig. S12** Highest occupied molecular orbital (HOMO) and lowest unoccupied molecular orbital (LUMO) of CQD/C<sub>3</sub>N hybrid computed by PBE functional<sup>S1</sup> and 6-31G basis set<sup>S2</sup> implemented by using Gaussian 16.<sup>S3</sup>

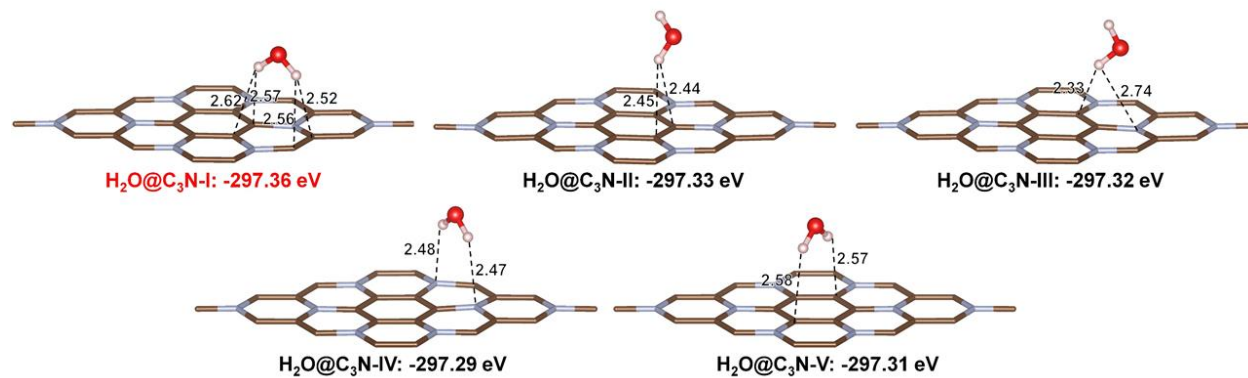

**Fig. S13** Various water adsorption configurations on  $C_3N$  and their corresponding energies. The most stable one (highlighted in red) was chosen as the initial structure for the subsequent NEB calculations.

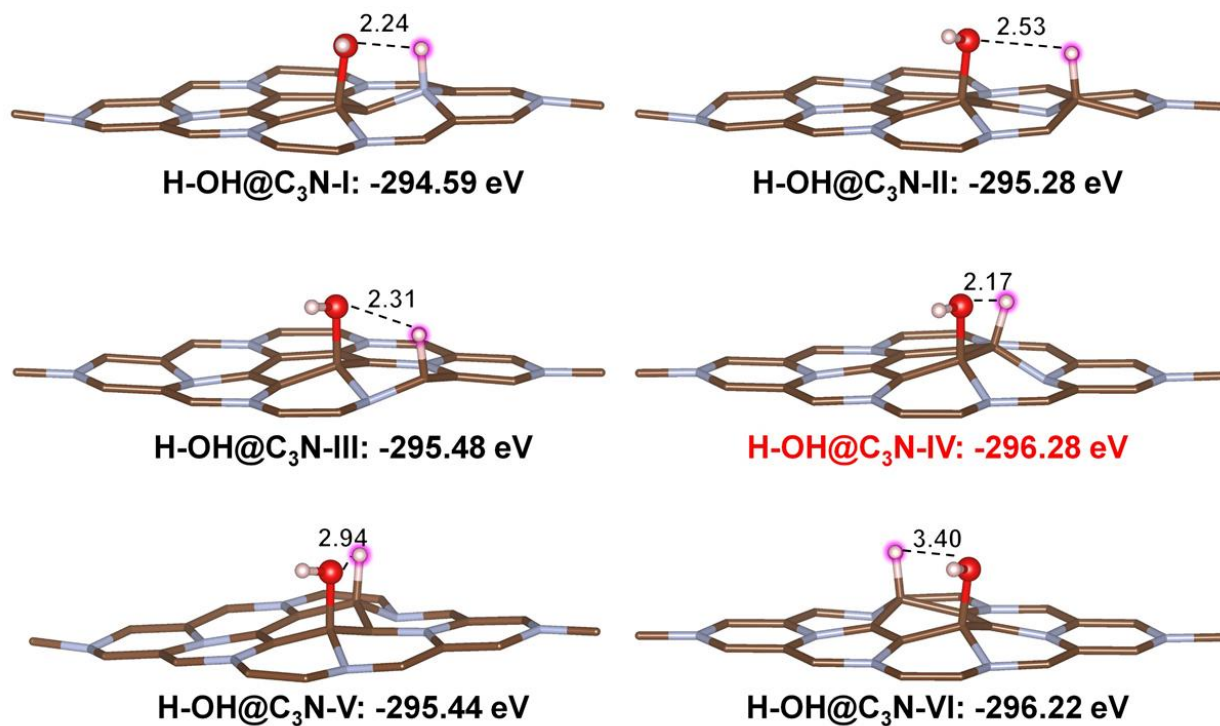

**Fig. S14** Various configurations of the products of water splitting on C<sub>3</sub>N and their corresponding energies. The most stable one (highlighted in red) was chosen as the final structure for the subsequent NEB calculations.

## References

- S1. J. P. Perdew, K. Burke and M. Ernzerhof, *Phys. Rev. Lett.*, 1996, **77**, 3865.
- S2. V. A. Rassolov, M. A. Ratner, J. A. Pople, P. C. Redfern, L. A. Curtiss, *J. Comput. Chem.*, 2001, **22** (9), 976-984.
- S3. M. J. Frisch, G. W. Trucks, H. B. Schlegel, G. E. Scuseria, M. A. Robb, J. R. Cheeseman, G. Scalmani, V. Barone, G. A. Petersson, H. Nakatsuji, X. Li, Gaussian 16, revision A. 03. Gaussian Inc., Wallingford CT. 2016.
